# Supplementary material for: Sand Particle Size and Phosphorus Amount Affect Rhizophagus irregularis Spore Production Using In Vitro Propagated Spore as a Starter Inoculum in Rhizosphere of Maize (Zea mays) Plantlets
Source: MDPI journal article supplement (doi:10.3390/jof7100846), 2021-10-09
Supplement: s1 [file s1]

**Supplementary table S1 : Composition of Modified Whit's (MW) medium**

| Nutrient                                              | Final Concentration (mg per liter media) |
|-------------------------------------------------------|------------------------------------------|
| MgSO <sub>4</sub> .7H <sub>2</sub> O                  | 731                                      |
| KNO <sub>3</sub>                                      | 80                                       |
| KCl                                                   | 65                                       |
| Na <sub>2</sub> SO <sub>4</sub>                       | 199.7                                    |
| Ca (NO <sub>3</sub> ) <sub>2</sub> .4H <sub>2</sub> O | 288                                      |
| Glycine                                               | 3                                        |
| Pyridoxine HCl                                        | 0.1                                      |
| Niacin                                                | 0.5                                      |
| Myoinositol                                           | 50                                       |
| Thiamine                                              | 0.1                                      |
| NaFeEDTA                                              | 8                                        |
| NaH <sub>2</sub> PO <sub>4</sub> .2H <sub>2</sub> O   | 21.5                                     |
| KI                                                    | 0.75                                     |
| MnCl <sub>2</sub> .4H <sub>2</sub> O                  | 6                                        |
| ZnSO <sub>4</sub> .7H <sub>2</sub> O                  | 4.2455                                   |
| H <sub>3</sub> BO <sub>3</sub>                        | 1.5                                      |
| CuSO <sub>4</sub> .5H <sub>2</sub> O                  | 0.13                                     |
| Na <sub>2</sub> MoO <sub>4</sub> .2H <sub>2</sub> O   | 0.0024                                   |
| Sucrose                                               | 30000                                    |

**Supplementary table S2: Composition of Minimal (M) medium**

| Nutrient                                              | Final Concentration (mM per liter media) |                     |                     |                     |                     |
|-------------------------------------------------------|------------------------------------------|---------------------|---------------------|---------------------|---------------------|
|                                                       | M media<br>(standard)                    | M media<br>(10μM P) | M media<br>(20μM P) | M media<br>(30μM P) | M media<br>(40μM P) |
| MgSO <sub>4</sub> .7H <sub>2</sub> O                  | 3                                        | 3                   | 3                   | 3                   | 3                   |
| KNO <sub>3</sub>                                      | 0.79                                     | 0.79                | 0.79                | 0.79                | 0.79                |
| KCl                                                   | 0.87                                     | 0.87                | 0.87                | 0.87                | 0.87                |
| Ca (NO <sub>3</sub> ) <sub>2</sub> .4H <sub>2</sub> O | 1.22                                     | 1.22                | 1.22                | 1.22                | 1.22                |
| NaFeEDTA                                              | 21.70                                    | 21.70               | 21.70               | 21.70               | 21.70               |
| KI                                                    | 4.50                                     | 4.50                | 4.50                | 4.50                | 4.50                |
| MnCl <sub>2</sub> .4H <sub>2</sub> O                  | 30.30                                    | 30.30               | 30.30               | 30.30               | 30.30               |
| ZnSO <sub>4</sub> .7H <sub>2</sub> O                  | 9.20                                     | 9.20                | 9.20                | 9.20                | 9.20                |
| H <sub>3</sub> BO <sub>3</sub>                        | 24.00                                    | 24.00               | 24.00               | 24.00               | 24.00               |
| CuSO <sub>4</sub> .5H <sub>2</sub> O                  | 0.50                                     | 0.50                | 0.50                | 0.50                | 0.50                |
| Na <sub>2</sub> MoO <sub>4</sub> .2H <sub>2</sub> O   | 0.01                                     | 0.01                | 0.01                | 0.01                | 0.01                |
| KH <sub>2</sub> PO <sub>4</sub>                       | <b>35.00</b>                             | <b>10.00</b>        | <b>20.00</b>        | <b>30.00</b>        | <b>40.00</b>        |
| Glycine                                               | 40.00                                    | 40.00               | 40.00               | 40.00               | 40.00               |
| Thiamine HCl                                          | 0.30                                     | 0.30                | 0.30                | 0.30                | 0.30                |
| Pyridoxine HCl                                        | 0.50                                     | 0.50                | 0.50                | 0.50                | 0.50                |
| Niacin                                                | 4.00                                     | 4.00                | 4.00                | 4.00                | 4.00                |
| Myoinositol                                           | 277.00                                   | 277.00              | 277.00              | 277.00              | 277.00              |
| Sucrose                                               | 10000                                    | 10000               | 10000               | 10000               | 10000               |

**Supplementary table S3: Sand physical properties and water holding capacity**

| Sand Grade | Bulk density (gcm <sup>-3</sup> ) | Solid particle density (gcm <sup>-3</sup> ) | % Pore Space | Soil water content (volume of water cm <sup>3</sup> /cm <sup>3</sup> dry sand) | Maximum Saturation capacity (SC), g/100 g | Field Capacity (FC), g/100 g | Wilting percentage (WP), g/100 g | Available water holding capacity (AWC) of sand at 0 - 18cm depth (cm) |
|------------|-----------------------------------|---------------------------------------------|--------------|--------------------------------------------------------------------------------|-------------------------------------------|------------------------------|----------------------------------|-----------------------------------------------------------------------|
| Grade A    | 1.56                              | 3.01                                        | 48.17        | 0.333                                                                          | 28.35                                     | 09.12                        | 1.51                             | 2.13                                                                  |
| Grade B    | 1.39                              | 2.53                                        | 45.06        | 0.357                                                                          | 29.43                                     | 15.46                        | 6.23                             | 2.31                                                                  |
| Grade C    | 1.31                              | 2.36                                        | 44.49        | 0.361                                                                          | 30.16                                     | 17.68                        | 7.65                             | 2.37                                                                  |
| Grade D    | 1.26                              | 2.29                                        | 44.98        | 0.400                                                                          | 33.79                                     | 22.97                        | 8.73                             | 3.23                                                                  |

Note: Available water Holding capacity (AWC), cm = Sand depth X Sand bulk density X ((FC/100)- (WP/100)) cm

**Supplementary table S4: Composition of Hoagland's nutrients solution**

| Nutrient                                              | Final Concentration per liter media |               |
|-------------------------------------------------------|-------------------------------------|---------------|
|                                                       | Half strength                       | Full strength |
| Ca (NO <sub>3</sub> ) <sub>2</sub> ·4H <sub>2</sub> O | 2.5 mM                              | 5 mM          |
| KNO <sub>3</sub>                                      | 2.5 mM                              | 5 mM          |
| MgSO <sub>4</sub> ·7H <sub>2</sub> O                  | 1.0 mM                              | 2 mM          |
| KH <sub>2</sub> PO <sub>4</sub>                       | <b>20 µM</b>                        | <b>40 µM</b>  |
| NaFeEDTA                                              | 50 µM                               | 0.1 mM        |
| Na <sub>2</sub> MoO <sub>4</sub> ·2H <sub>2</sub> O   | 0.2 µM                              | 0.2 µM        |
| H <sub>3</sub> BO <sub>3</sub>                        | 10 µM                               | 10 µM         |
| NiSO <sub>4</sub> ·6H <sub>2</sub> O                  | 0.2 µM                              | 0.2 µM        |
| ZnSO <sub>4</sub> ·7H <sub>2</sub> O                  | 1.0 µM                              | 1.0 µM        |
| MnCl <sub>2</sub> ·4H <sub>2</sub> O                  | 2.0 µM                              | 2.0 µM        |
| CuSO <sub>4</sub> ·5H <sub>2</sub> O                  | 0.5 µM                              | 0.5 µM        |
| CoCl <sub>2</sub> ·6H <sub>2</sub> O                  | 0.2 µM                              | 0.2 µM        |
| MES buffer                                            | 0.5 mM                              | 0.5 mM        |

**Supplementary table S5: Hoagland's nutrient application**

| Sand Grade | Treatment | Application Duration<br>(Range of Days) | Demineralized Distill Water Application Time 9.00 AM<br>(ml/Kg sand) | Hoagland Solution Application Time 4.00 PM<br>(ml/ Kg Sand) |                     |               |                     |
|------------|-----------|-----------------------------------------|----------------------------------------------------------------------|-------------------------------------------------------------|---------------------|---------------|---------------------|
|            |           |                                         |                                                                      | Full strength                                               | Full strength (- P) | Half strength | Half strength (- P) |
| A          | T1        | 01 to 50 days                           | 40                                                                   | 20                                                          | -                   | -             | -                   |
|            |           | 51 to 90 days                           | 40                                                                   | 20                                                          | -                   | -             | -                   |
|            | T2        | 01 to 50 days                           | 40                                                                   | 20                                                          | -                   | -             | -                   |
|            |           | 51 to 90 days                           | 40                                                                   | <b>-P</b>                                                   | 20                  | -             | -                   |
|            | T3        | 01 to 50 days                           | 40                                                                   | -                                                           | -                   | 20            | -                   |
|            |           | 51 to 90 days                           | 40                                                                   | -                                                           | -                   | 20            | -                   |
|            | T4        | 01 to 50 days                           | 40                                                                   | -                                                           | -                   | 20            | -                   |
|            |           | 51 to 90 days                           | 40                                                                   | -                                                           | -                   | <b>-P</b>     | 20                  |
| B          | T1        | 01 to 50 days                           | 40                                                                   | 20                                                          | -                   | -             | -                   |
|            |           | 51 to 90 days                           | 40                                                                   | 20                                                          | -                   | -             | -                   |
|            | T2        | 01 to 50 days                           | 40                                                                   | 20                                                          | -                   | -             | -                   |
|            |           | 51 to 90 days                           | 40                                                                   | <b>-P</b>                                                   | 20                  | -             | -                   |
|            | T3        | 01 to 50 days                           | 40                                                                   | -                                                           | -                   | 20            | -                   |
|            |           | 51 to 90 days                           | 40                                                                   | -                                                           | -                   | 20            | -                   |
|            | T4        | 01 to 50 days                           | 40                                                                   | -                                                           | -                   | 20            | -                   |
|            |           | 51 to 90 days                           | 40                                                                   | -                                                           | -                   | <b>-P</b>     | 20                  |
| C          | T1        | 01 to 50 days                           | 40                                                                   | 20                                                          | -                   | -             | -                   |
|            |           | 51 to 90 days                           | 40                                                                   | 20                                                          | -                   | -             | -                   |
|            | T2        | 01 to 50 days                           | 40                                                                   | 20                                                          | -                   | -             | -                   |
|            |           | 51 to 90 days                           | 40                                                                   | <b>-P</b>                                                   | 20                  | -             | -                   |
|            | T3        | 01 to 50 days                           | 40                                                                   | -                                                           | -                   | 20            | -                   |
|            |           | 51 to 90 days                           | 40                                                                   | -                                                           | -                   | 20            | -                   |
|            | T4        | 01 to 50 days                           | 40                                                                   | -                                                           | -                   | 20            | -                   |
|            |           | 51 to 90 days                           | 40                                                                   | -                                                           | -                   | <b>-P</b>     | 20                  |
| D          | T1        | 01 to 50 days                           | 40                                                                   | 20                                                          | -                   | -             | -                   |
|            |           | 51 to 90 days                           | 40                                                                   | 20                                                          | -                   | -             | -                   |
|            | T2        | 01 to 50 days                           | 40                                                                   | 20                                                          | -                   | -             | -                   |
|            |           | 51 to 90 days                           | 40                                                                   | <b>-P</b>                                                   | 20                  | -             | -                   |
|            | T3        | 01 to 50 days                           | 40                                                                   | -                                                           | -                   | 20            | -                   |
|            |           | 51 to 90 days                           | 40                                                                   | -                                                           | -                   | 20            | -                   |
|            | T4        | 01 to 50 days                           | 40                                                                   | -                                                           | -                   | 20            | -                   |
|            |           | 51 to 90 days                           | 40                                                                   | -                                                           | -                   | <b>-P</b>     | 20                  |

Note: Treatment

T1= Full-strength Hoagland's solution with 40  $\mu$ M P;

T2= full strength Hoagland with P omission (-P);

T3 = Half-strength Hoagland's solution with 20  $\mu$ M P;

T4 = half-strength Hoagland with P omission (-P)

**Supplementary table S6: Average spore size of *R. irregularis* grown in M-Medium supplemented with different level of P. Data are means  $\pm$  SE (n = 10).**

| Treatment | Minimal (M) media                                             | phosphorus (P) concentration              | Average Spore size ( $\mu\text{m}$ ) |
|-----------|---------------------------------------------------------------|-------------------------------------------|--------------------------------------|
| T1        | Modified M-media (40 $\mu\text{M}$ $\text{KH}_2\text{PO}_4$ ) | 40 $\mu\text{M}$ $\text{KH}_2\text{PO}_4$ | 61 $\pm$ 13                          |
| T2        | M-media (control)                                             | 35 $\mu\text{M}$ $\text{KH}_2\text{PO}_4$ | 58 $\pm$ 13                          |
| T3        | Modified M-media (30 $\mu\text{M}$ $\text{KH}_2\text{PO}_4$ ) | 30 $\mu\text{M}$ $\text{KH}_2\text{PO}_4$ | 57 $\pm$ 11                          |
| T4        | Modified M-media (20 $\mu\text{M}$ $\text{KH}_2\text{PO}_4$ ) | 20 $\mu\text{M}$ $\text{KH}_2\text{PO}_4$ | 52 $\pm$ 11                          |
| T5        | Modified M-media (10 $\mu\text{M}$ $\text{KH}_2\text{PO}_4$ ) | 10 $\mu\text{M}$ $\text{KH}_2\text{PO}_4$ | 46 $\pm$ 10                          |

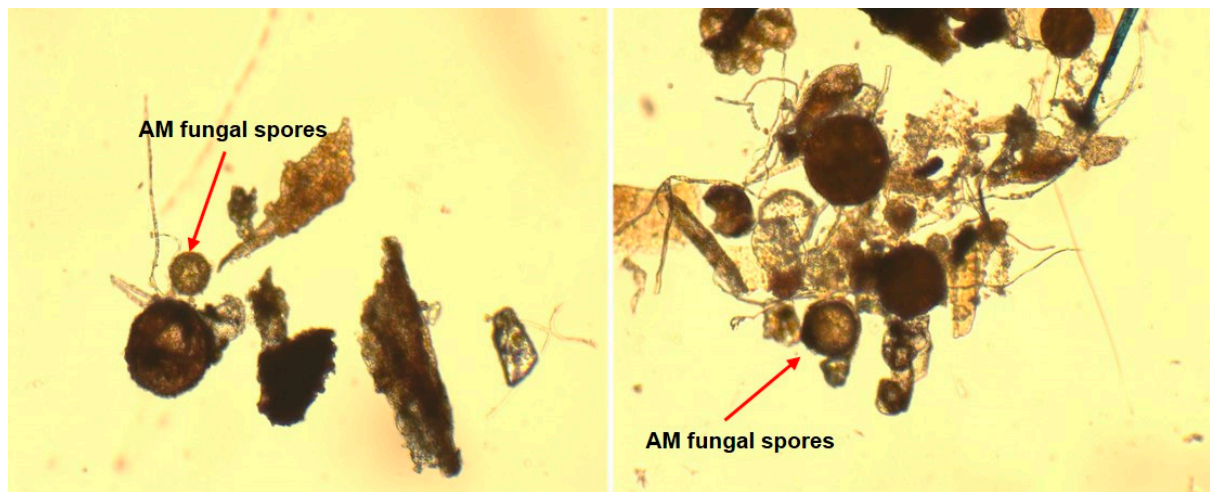

**Supplementary figure S1: Arbuscular mycorrhizal (AM) fungal spores isolated from soil.**

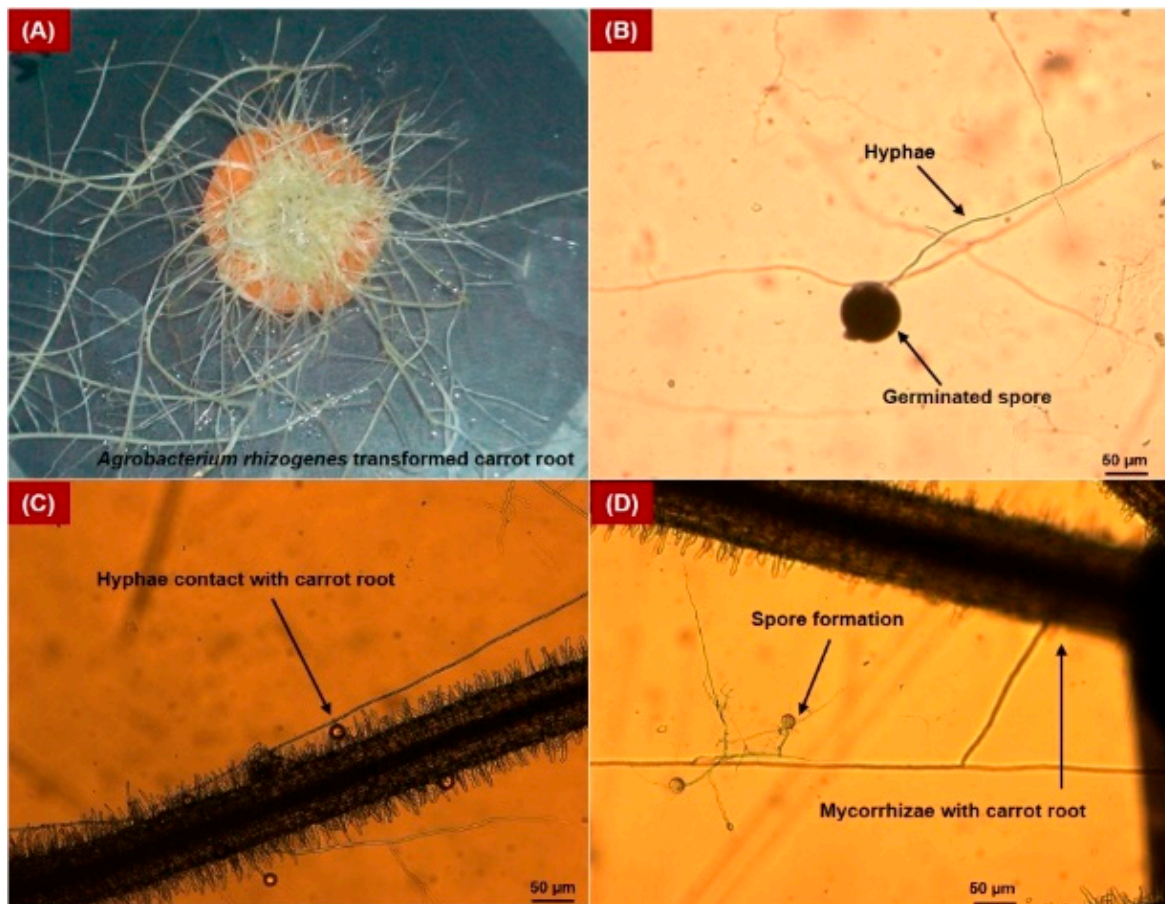

**Supplementary figure S2. Establishment of monoxenic culture of AM fungi. (A) Induction of *A. rhizogenes* (ICMP8640) transformed carrot hairy root; (B) Germination of sterilized spore in M medium; (C) Mycorrhizal (germinated spore) in contact with carrot hairy root; (D) Mycorrhization of transformed carrot root**

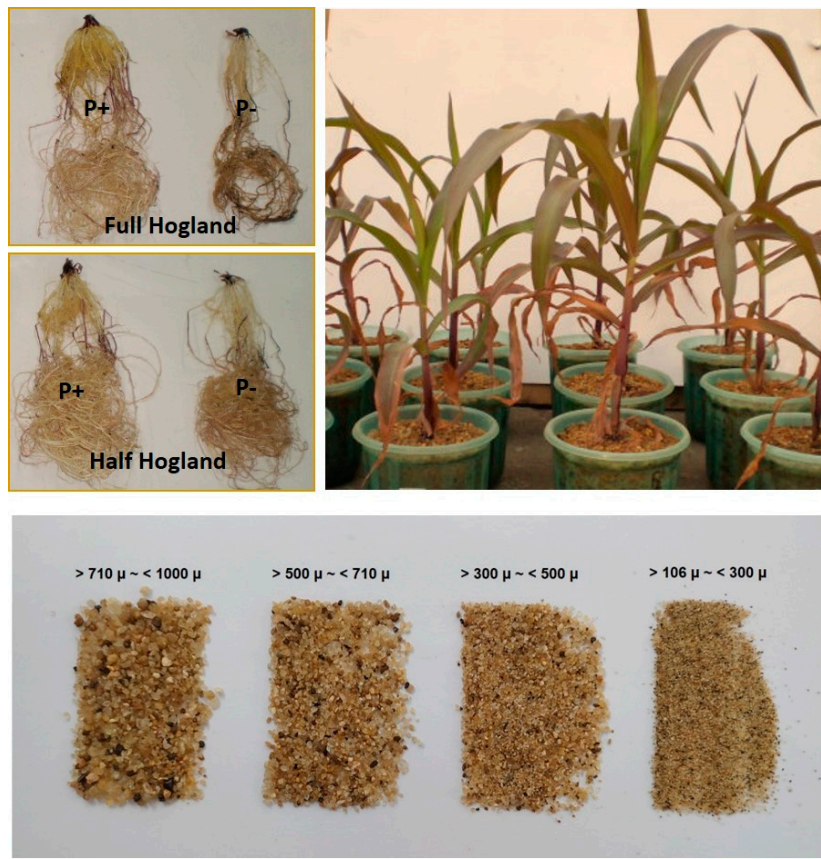

Supplementary figure S3: Illustration of pot experiment of maize plant inoculated with *R. irregularis* in different sand grade of sand.

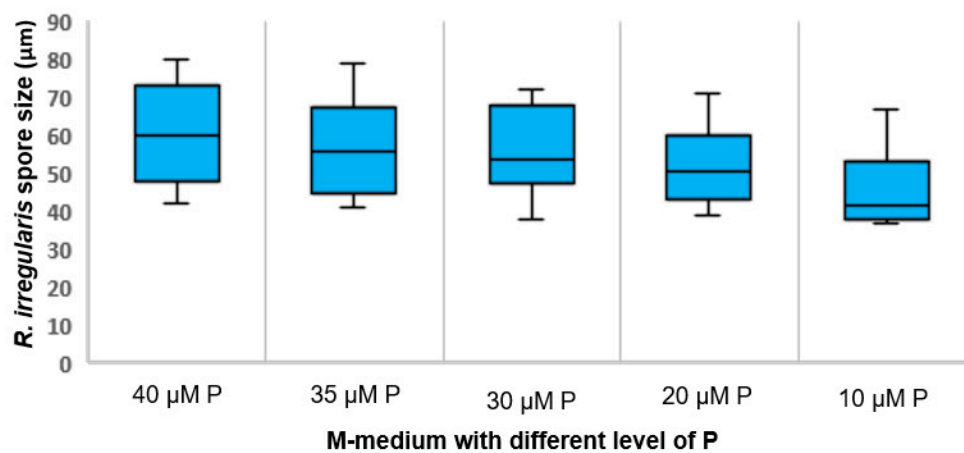

Supplementary figure S4: Box-plot described the spore size of *R. irregularis* grown in M-Medium supplemented with different level of P. The black line inside each box represents the median value (n= 10)
